# Supplementary material for: Social reference managers and their users: A survey of demographics and ideologies
Source: PLOS journal article supplement (doi:10.1371/journal.pone.0198033), 2018-07-11
Supplement: S3 (10.1371/journal.pone.0198033.s003) [file journal.pone.0198033.s003]

Table S2. How long have you been using Mendeley/Zotero?

| Platform | <3 months    | 3–6 months   | 6 months<br>to 1 year | 1–4 years      | 4–7 years      | 7+ years       | Not sure     |
|----------|--------------|--------------|-----------------------|----------------|----------------|----------------|--------------|
| Mendeley | 14<br>(1.8%) | 24<br>(3.1%) | 169<br>(22.0%)        | 475<br>(61.9%) | 75<br>(9.8%)   | –              | 10<br>(1.3%) |
| Zotero   | 11<br>(2.1%) | 23<br>(4.3%) | 21<br>(4.0%)          | 185<br>(35.0%) | 173<br>(32.7%) | 113<br>(21.4%) | 3<br>(0.6%)  |
