# Supplementary material for: Social reference managers and their users: A survey of demographics and ideologies
Source: PLOS journal article supplement (doi:10.1371/journal.pone.0198033), 2018-07-11
Supplement: S8 (10.1371/journal.pone.0198033.s008) [file journal.pone.0198033.s008]

Table S7. How often do you do the following adding and organizing tasks on Mendeley/Zotero?

| Platform                                                          | Daily          | Weekly         | Monthly        | Yearly         | <1 year        | Never          |
|-------------------------------------------------------------------|----------------|----------------|----------------|----------------|----------------|----------------|
| <i>Upload publications</i>                                        |                |                |                |                |                |                |
| Mendeley                                                          | 63<br>(8.2%)   | 253<br>(33.0%) | 216<br>(28.2%) | 58<br>(7.6%)   | 36<br>(4.7%)   | 141<br>(18.4%) |
| Zotero                                                            | 126<br>(23.8%) | 209<br>(39.5%) | 90<br>(17.0%)  | 13<br>(2.5%)   | 15<br>(2.8%)   | 76<br>(14.4%)  |
| <i>Upload other material (e.g., datasets, figures, videos)</i>    |                |                |                |                |                |                |
| Mendeley                                                          | 12<br>(1.6%)   | 52<br>(6.8%)   | 87<br>(11.3%)  | 49<br>(6.4%)   | 56<br>(7.3%)   | 511<br>(66.6%) |
| Zotero                                                            | 16<br>(3.0%)   | 68<br>(12.9%)  | 103<br>(19.5%) | 58<br>(11.0%)  | 37<br>(7.0%)   | 247<br>(46.7%) |
| <i>Complete or correct the bibliographic information of items</i> |                |                |                |                |                |                |
| Mendeley                                                          | 65<br>(8.5%)   | 214<br>(27.9%) | 271<br>(35.3%) | 75<br>(9.8%)   | 47<br>(6.1%)   | 95<br>(12.4%)  |
| Zotero                                                            | 84<br>(15.9%)  | 202<br>(38.2%) | 156<br>(29.5%) | 35<br>(6.6%)   | 19<br>(3.6%)   | 33<br>(6.2%)   |
| <i>Organize items by topic or project (e.g., tags, folders)</i>   |                |                |                |                |                |                |
| Mendeley                                                          | 59<br>(7.7%)   | 203<br>(26.5%) | 252<br>(32.9%) | 101<br>(13.2%) | 51<br>(6.6%)   | 101<br>(13.2%) |
| Zotero                                                            | 100<br>(18.9%) | 191<br>(36.1%) | 158<br>(29.9%) | 42<br>(7.9%)   | 18<br>(3.4%)   | 20<br>(3.8%)   |
| <i>Annotate items (e.g., add notes, highlights)</i>               |                |                |                |                |                |                |
| Mendeley                                                          | 71<br>(9.3%)   | 165<br>(21.5%) | 214<br>(27.9%) | 77<br>(10.0%)  | 58<br>(7.6%)   | 182<br>(23.7%) |
| Zotero                                                            | 75<br>(14.2%)  | 163<br>(30.8%) | 146<br>(27.6%) | 47<br>(8.9%)   | 31<br>(5.9%)   | 67<br>(12.7%)  |
| <i>Delete items from library</i>                                  |                |                |                |                |                |                |
| Mendeley                                                          | 19<br>(2.5%)   | 68<br>(8.9%)   | 199<br>(25.9%) | 167<br>(21.8%) | 101<br>(13.2%) | 213<br>(27.8%) |
| Zotero                                                            | 47<br>(8.9%)   | 113<br>(21.4%) | 186<br>(35.2%) | 97<br>(18.3%)  | 41<br>(7.8%)   | 45<br>(8.5%)   |
