# Supplementary material for: Social reference managers and their users: A survey of demographics and ideologies
Source: PLOS journal article supplement (doi:10.1371/journal.pone.0198033), 2018-07-11
Supplement: S24 (10.1371/journal.pone.0198033.s024) [file journal.pone.0198033.s024]

Table S23. Indicate your level of agreement with the following statements — Peer-review system and scholarly publication.

| Platform                                                               | Strongly Disagree | Disagree       | Neither Agree nor Disagree | Agree          | Strongly Agree |
|------------------------------------------------------------------------|-------------------|----------------|----------------------------|----------------|----------------|
| <i>I think that the current peer-review system is broken.</i>          |                   |                |                            |                |                |
| Mendeley                                                               | 12<br>(1.6%)      | 113<br>(14.7%) | 386<br>(50.3%)             | 183<br>(23.9%) | 73<br>(9.5%)   |
| Zotero                                                                 | 3<br>(0.6%)       | 33<br>(6.2%)   | 214<br>(40.5%)             | 178<br>(33.6%) | 101<br>(19.1%) |
| <i>The profit margin for publishers is too high.</i>                   |                   |                |                            |                |                |
| Mendeley                                                               | 7<br>(0.9%)       | 30<br>(3.9%)   | 355<br>(46.3%)             | 211<br>(27.5%) | 164<br>(21.4%) |
| Zotero                                                                 | 2<br>(0.4%)       | 14<br>(2.6%)   | 131<br>(24.8%)             | 149<br>(28.2%) | 233<br>(44.0%) |
| <i>The journals in which I publish add credibility to my research.</i> |                   |                |                            |                |                |
| Mendeley                                                               | 5<br>(0.7%)       | 20<br>(2.6%)   | 129<br>(16.8%)             | 397<br>(51.8%) | 216<br>(28.2%) |
| Zotero                                                                 | 7<br>(1.3%)       | 14<br>(2.6%)   | 124<br>(23.4%)             | 305<br>(57.7%) | 79<br>(14.9%)  |
| <i>Journals are necessary for scholarly communication.</i>             |                   |                |                            |                |                |
| Mendeley                                                               | 8<br>(1.0%)       | 37<br>(4.8%)   | 97<br>(12.6%)              | 385<br>(50.2%) | 240<br>(31.3%) |
| Zotero                                                                 | 12<br>(2.3%)      | 59<br>(11.2%)  | 123<br>(23.3%)             | 241<br>(45.6%) | 94<br>(17.8%)  |
| <i>Publishers are necessary for scholarly communication.</i>           |                   |                |                            |                |                |
| Mendeley                                                               | 21<br>(2.7%)      | 80<br>(10.4%)  | 213<br>(27.8%)             | 362<br>(47.2%) | 91<br>(11.9%)  |
| Zotero                                                                 | 29<br>(5.5%)      | 118<br>(22.3%) | 188<br>(35.5%)             | 158<br>(29.9%) | 36<br>(6.8%)   |
